# Supplementary material for: Currents through Hv1 channels deplete protons in their vicinity
Source: PubMed Central journal article supplement — J Gen Physiol. 2016 Feb;147(2):127–36. doi: 10.1085/jgp.201511496 (PMC4727945; doi:10.1085/jgp.201511496), 2016-02
Supplement: supp_jgp.201511496_JGP_201511496_sm.pdf [file supp_jgp.201511496_JGP_201511496_sm.pdf]

De-la-Rosa et al., <http://www.jgp.org/cgi/content/full/jgp.201511496/DC1>

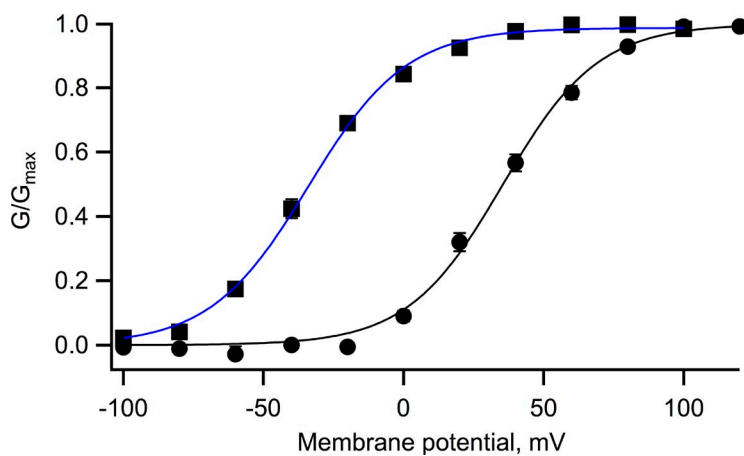

**Figure S1.** Mean conductance versus voltage curves of Hv1-Venus channels. The square symbols represent the mean conductance measured with a pH gradient of  $\text{pH}_i = 5.5$ ,  $\text{pH}_o = 7$  ( $n = 7$ ). Circles are the mean conductance with  $\text{pH}_i = 7$ ,  $\text{pH}_o = 7$  ( $n = 6$ ). The continuous curves are fits to Eq. 2 with the following parameters: blue curve,  $q_a = 1.43 e_0$  and  $V_{0.5} = -34$  mV; black curve,  $q_a = 1.47 e_0$  and  $V_{0.5} = 35.4$  mV. Error bars are the standard error.
